# Supplementary material for: Multifunctional manganese-doped core–shell quantum dots for magnetic resonance and fluorescence imaging of cancer cells
Source: Royal Society of Chemistry journal article supplement (doi:10.1039/c3nj00407d), 2013-01-01
Supplement: c3nj00407d.pdf [file c3nj00407d.pdf]

## Supporting Information

### Multifunctional manganese-doped core/shell quantum dots for magnetic resonance and fluorescence imaging of cancer cells

Babao Lin,<sup>†a</sup> Xiuzhong Yao,<sup>†b</sup> Yihua Zhu,<sup>a\*</sup> Jianhua Shen,<sup>a</sup> Xiaoling Yang,<sup>a</sup> Hongliang Jiang,<sup>a</sup>  
and Xiaoqing Zhang<sup>a</sup>

<sup>a</sup>. *Key Laboratory for Ultrafine Materials of Ministry of Education, School of Materials  
Science and Engineering, East China University of Science and Technology, Shanghai  
200237, China.*

<sup>b</sup>. *Department of Radiology, Zhongshan Hospital of Fudan University and Department of  
Medical Image, Shanghai Medical College of Fudan University, Shanghai Institute of  
Medical Imaging, 138 Fenglin Road, Shanghai 200032, China.*

\*Corresponding author: Fax: +86-21-64250624; Tel: +86 21 64252022; yhzhu@ecust.edu.cn (Y. Zhu)

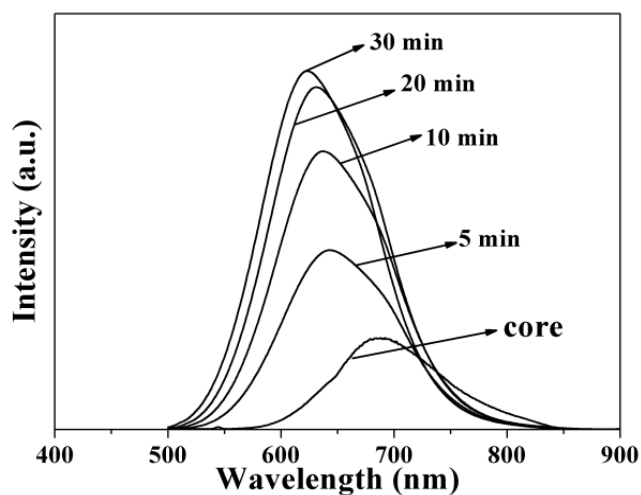

**Figure S1.** Evolution of PL spectra of the resulting QDs during the growth of a ZnS shell.

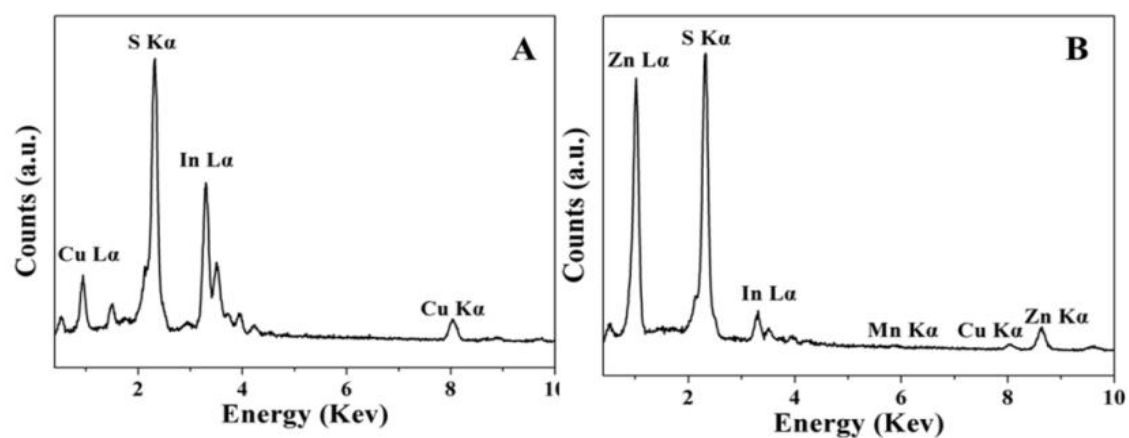

**Figure S2.** EDX spectra of core QDs (A) and core/shell QDs (B).

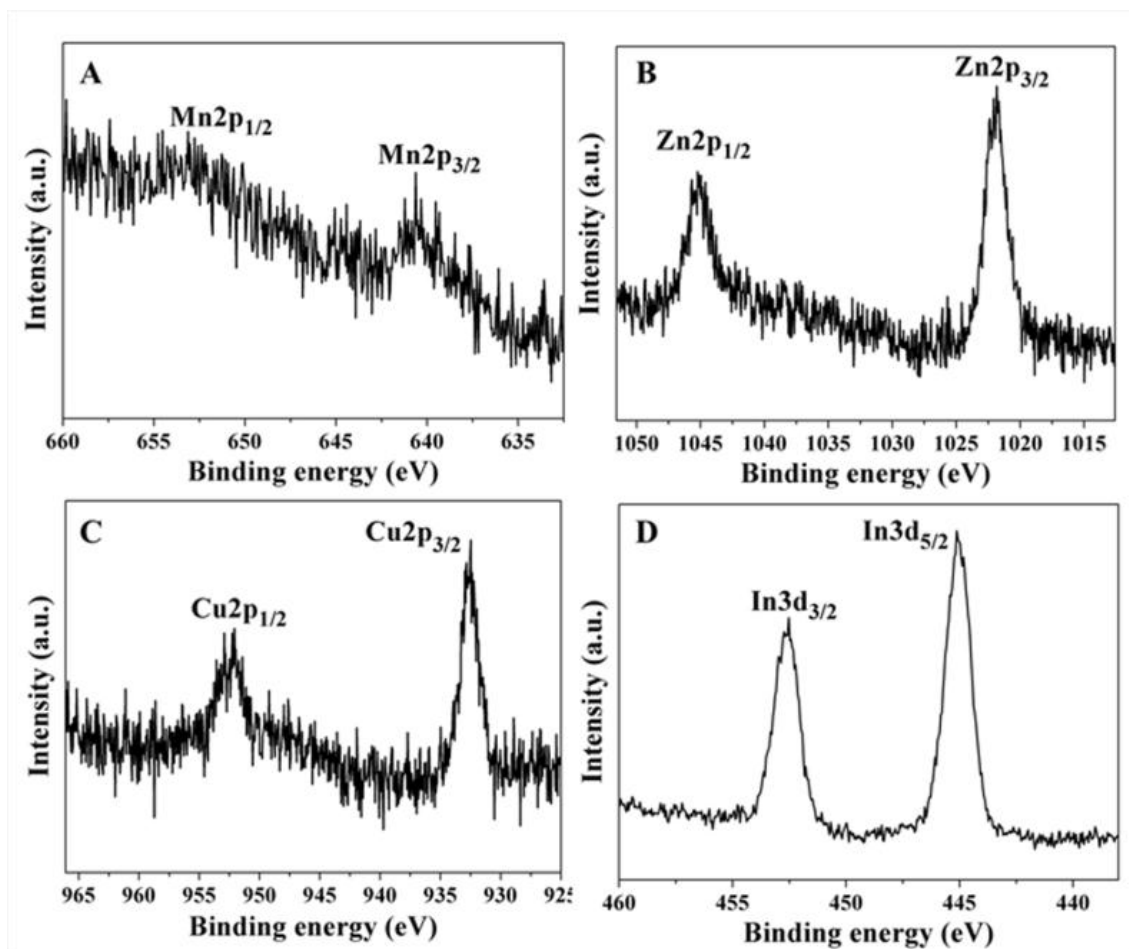

**Figure S3.** XPS spectra of the core/shell QDs. (A) Mn2p, (B) Zn2p, (C) Cu2p and (D) In3d.

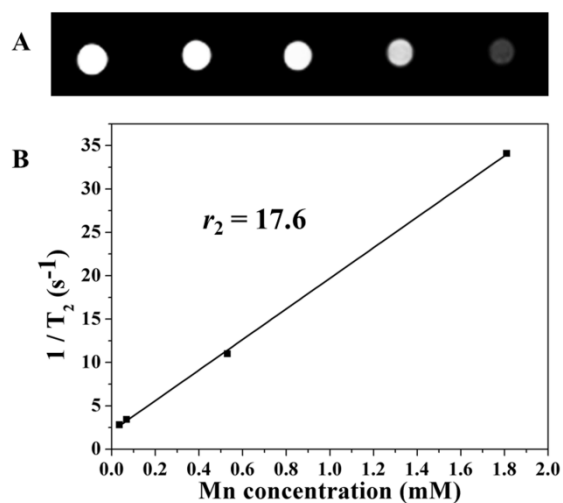

**Figure S4.** Multimodal core/shell quantum dots are detectable by MRI. (A) MR detection. Nanoparticles imaged by  $T_2$ -weighted MRI show increasing signal reduction as  $\text{Mn}^{2+}$  concentration increases (from left to right, 0, 0.035, 0.068, 0.53, 1.81 mM). (B)  $T_2$  relaxivity plot of aqueous suspension of  $\text{CuInS}_2/\text{Zn}_{1-x}\text{Mn}_x\text{S}$ .
